EXPRESSION OF CONCERN

## Expression of Concern: Compressive strength prediction and low-carbon optimization of fly ash geopolymer concrete based on big data and ensemble learning

The *PLOS One* Editors

After this article [1] was published, the *PLOS One* Editors identified concerns about the article's peer review. We regret that the issues were not addressed prior to the article's publication. Readers are advised to interpret the article [1] with caution.

### Reference

1. Jiang P, Zhao D, Jin C, Ye S, Luan C, Tufail RF. Compressive strength prediction and low-carbon optimization of fly ash geopolymer concrete based on big data and ensemble learning. *PLoS One*. 2024;19(9):e0310422. <https://doi.org/10.1371/journal.pone.0310422> PMID: [39264969](https://pubmed.ncbi.nlm.nih.gov/39264969/)

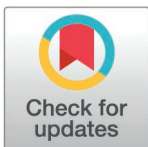

### OPEN ACCESS

Citation: The *PLOS One* Editors (2026) Expression of Concern: Compressive strength prediction and low-carbon optimization of fly ash geopolymer concrete based on big data and ensemble learning. *PLoS One* 21(4): e0346735. <https://doi.org/10.1371/journal.pone.0346735>

**Published:** April 8, 2026

**Copyright:** © 2026 The *PLOS One* Editors. This is an open access article distributed under the terms of the [Creative Commons Attribution License](https://creativecommons.org/licenses/by/4.0/), which permits unrestricted use, distribution, and reproduction in any medium, provided the original author and source are credited.
